# Supplementary material
Source: HighWire-hosted journal article supplement (https://bmjopen.bmj.com/content/6/9/e011422)

## Supplementary material 2: Validity and balance checks for outcomes (graphs a-f) and covariates (graphs g-j)

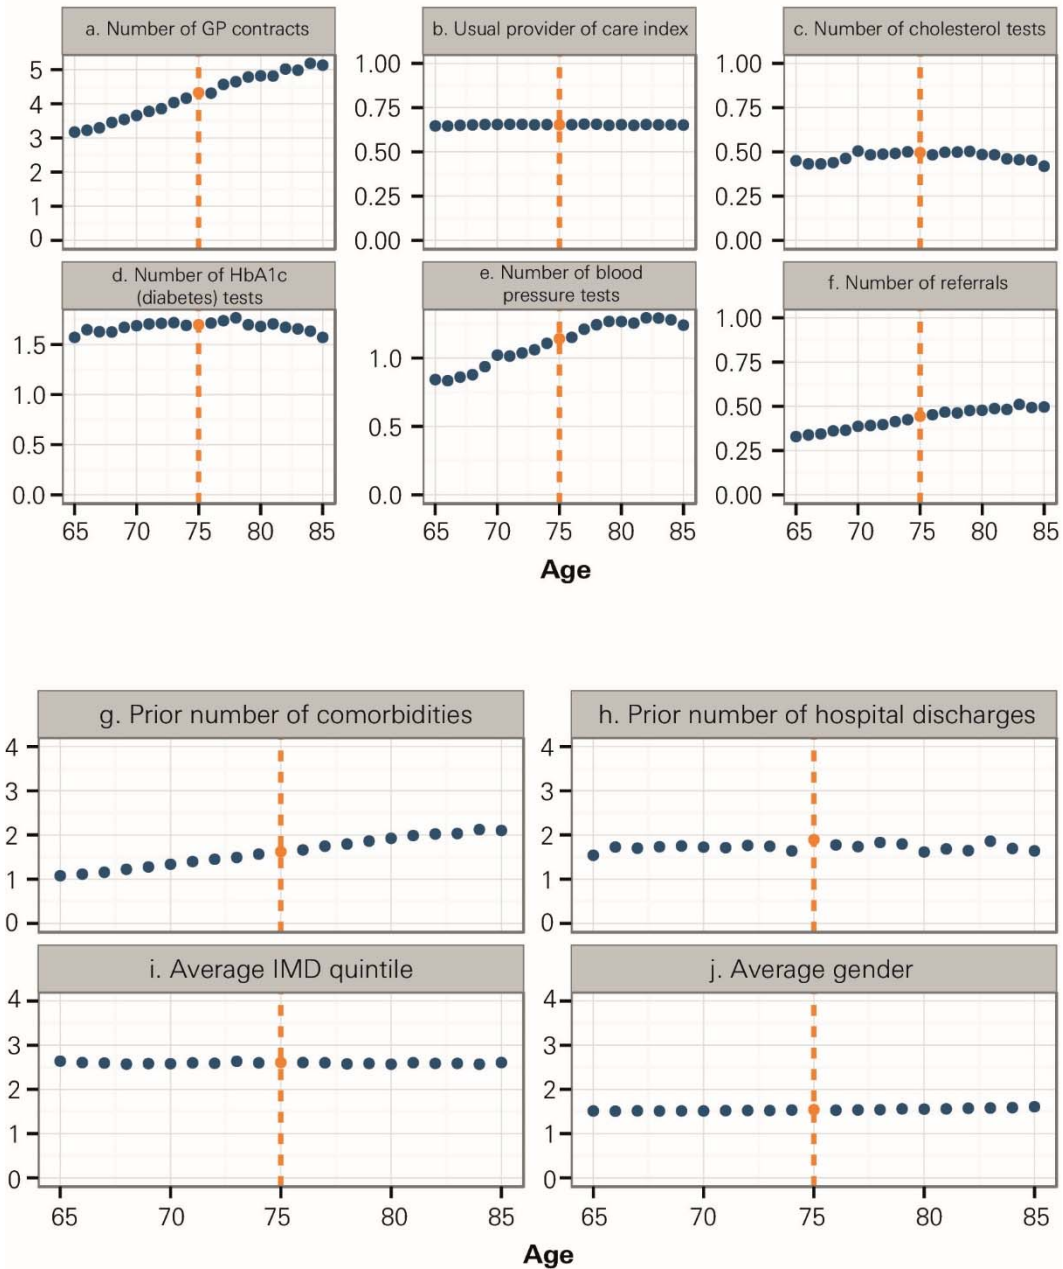

Supplement: inline-supplementary-material-3 [file inline-supplementary-material-3.pdf]
