# Supplementary material
Source: HighWire-hosted journal article supplement (https://bmjopen.bmj.com/content/6/9/e011422)

### Supplementary Material 1: Histogram of Age

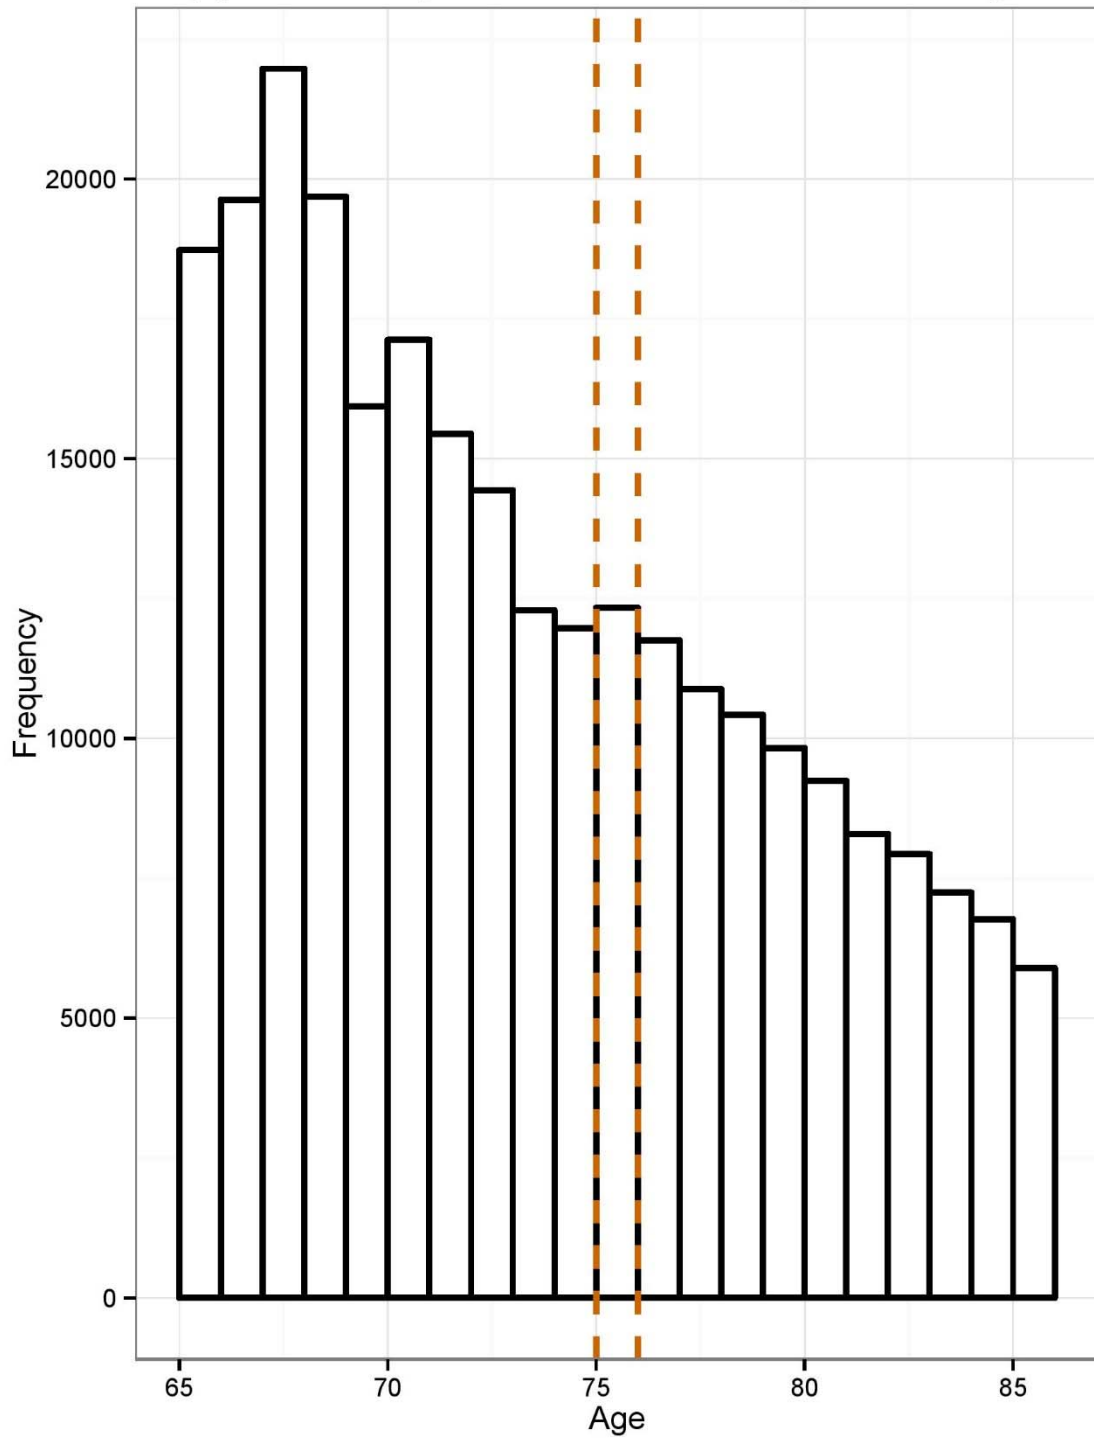

Supplement: inline-supplementary-material-2 [file inline-supplementary-material-2.pdf]

## Supplementary material 4: Sensitivity analysis: Model specification (order of polynomial)

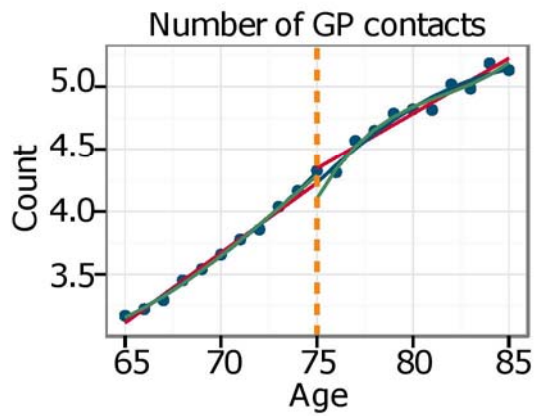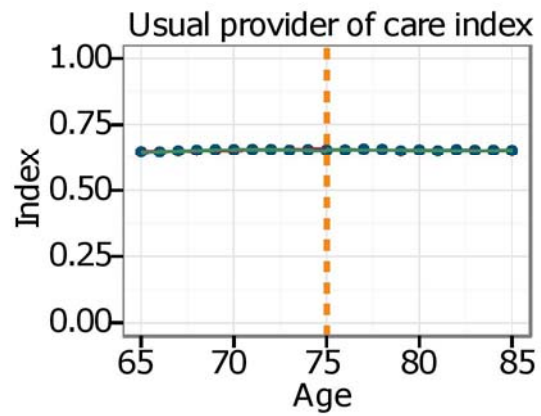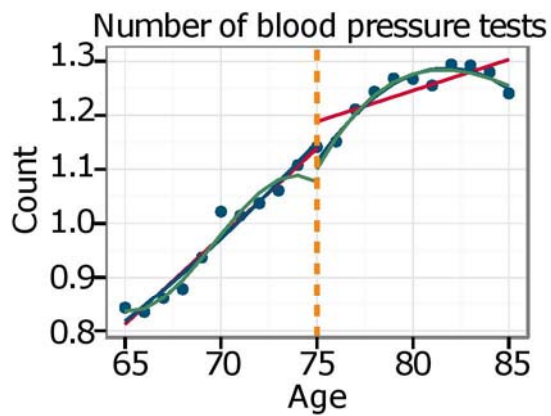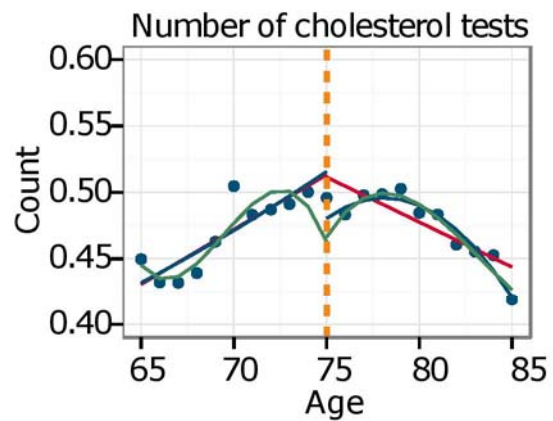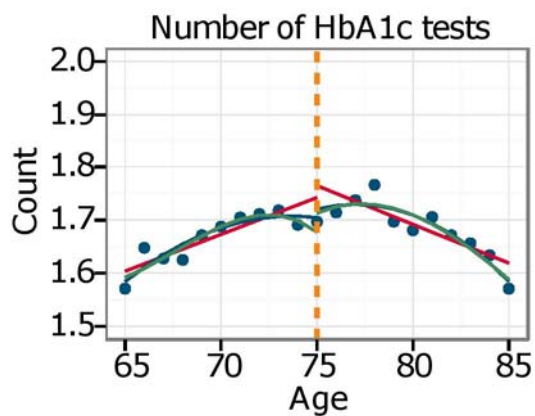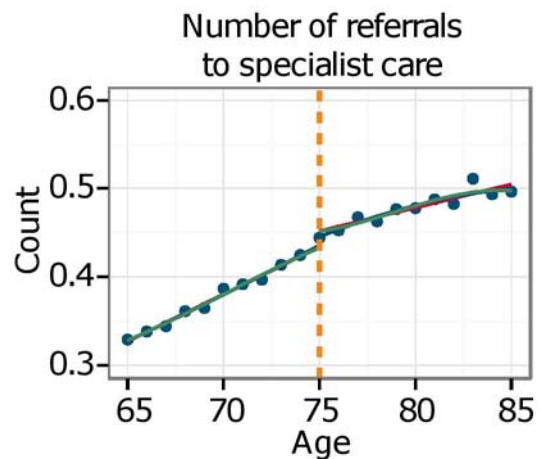

Supplement: inline-supplementary-material-5 [file inline-supplementary-material-5.pdf]

Supplementary material 7: Histogram of the usual provider of care index

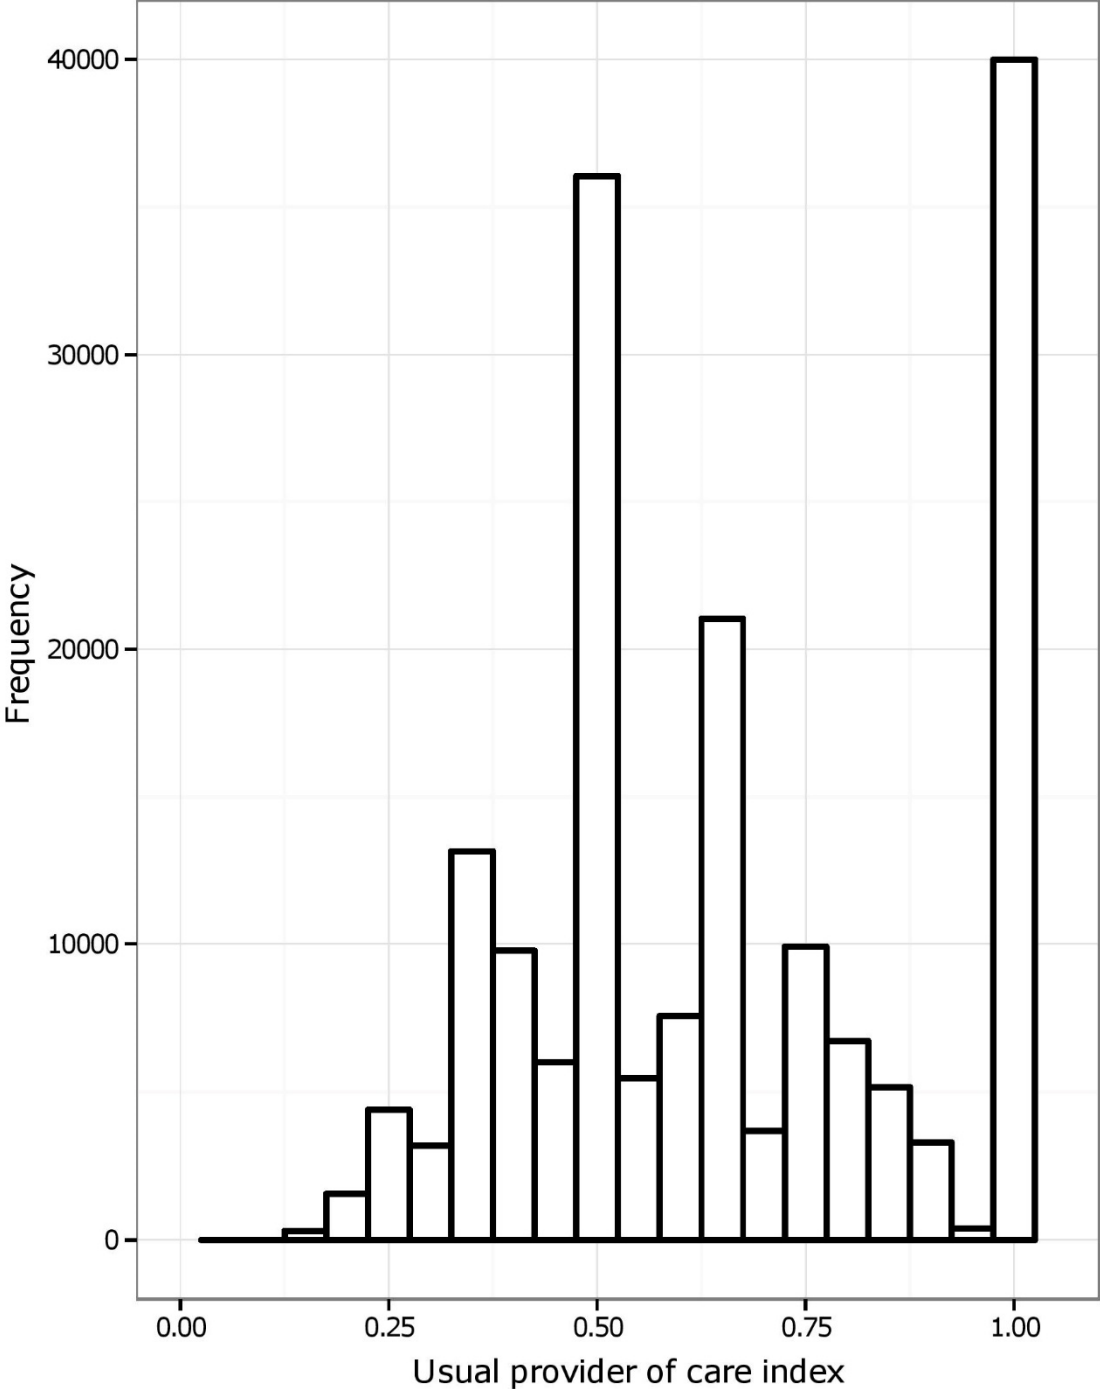

Supplement: inline-supplementary-material-8 [file inline-supplementary-material-8.pdf]
